# Supplementary material
Source: publisher site journal article supplement (https://www.dovepress.com/article/450166)
Supplement: Supplementary file 1 [file get_supplementary_file.php]

**Exploring Perceptions and Practices of Interprofessional Shared Decision-Making Education in Palliative Care** **Settings**

**Supplementary materials**

**Figure S1.** Data collection tool for faculty members and health professionals.

**Figure S2.** Data collection tool for health professions students.

**Figure S1.** Data collection tool for faculty members and health professionals

**Perceptions and practice from the faculty members' and health professionals' perspectives toward Interprofessional Shared Decision-Making (IP-SDM) for health professions education in palliative care.**

You are kindly being invited to participate in a study about Interprofessional Shared Decision-Making (IP-SDM) for health professions education in palliative care. The study will be conducted at King Abdulaziz Medical City, Jeddah. By conducting this study, we explore what your opinion is about IP-SDM in palliative care. You don’t have to have any experience with this topic yet. There are no ‘right’ or ‘wrong’ answers, we would like to know your opinion!

This survey consists of a total of 55 questions with multiple answering options. It takes approximately 8-10 minutes to complete. If you have any questions about the study, please contact Ms. Lama Sultan ([sultanla@mngha.med.sa](mailto:sultanla@mngha.med.sa)). The study has been approved by King Abdullah International Medical Research Center (KAIMRC), IRB (RJ20/242/J).

Your participation in this survey will be highly appreciated.

Your participation is completely voluntary. You are free to decline to participate for any reason. You may also stop participating at any time or refuse to answer any individual questions. Your acceptance to complete this survey will be interpreted as your informed consent to participate.

I have read and I understand the information about the study and what it means to me if I participate.

| I agree | I disagree |
| --- | --- |

- **Section one:**

*In this section,* *there are 19 questions about demographic, your study background, working background and familiarity with the topic:*

1. **Gender**

| Male | Female |
| --- | --- |

1. **Age ___________________ years**
2. **Nationality __________________**
3. **Institute ______________________**
4. **Department/College ___________________________**
5. **Job title ______________________**
6. **Highest level of education ______________________**
7. **Have you studied abroad?**

| Yes | No |
| --- | --- |

1. **Have you trained or worked abroad?**

| Yes | No |
| --- | --- |

1. **Are you currently working as a faculty?**

| Yes | No |
| --- | --- |

1. **If yes, are you a full time or part time faculty?**

| Full time | Part time |
| --- | --- |

1. **How many years of teaching experience do you have?**

| No experience | 1 year or less | 2-5 years | 6-9 years | 10 years or more |
| --- | --- | --- | --- | --- |

1. **How many years of clinical experience do you have?**

| No experience | 1 year or less | 2-5 years | 6-9 years | 10 years or more |
| --- | --- | --- | --- | --- |

1. **Do you have any experience with interprofessional education? Check the box that is most applicable**

*According to the WHO (2010), interprofessional education (IPE) is an experience that “occurs when students from two or more professions learn about, from, and with each other”.*

|  | Yes, during training (undergrad or grad) |
| --- | --- |
|  | Yes, during professional career/work (continuous professional development) |
|  | Yes, during training and work |
|  | No |

1. **Do you have any experience with interprofessional collaboration in your current job?**

| Yes | No |
| --- | --- |

1. **Do you have experience with** **shared decision-making (SDM)?**

*(SDM) is defined as: ‘an approach where clinicians and patients share the best available evidence when faced with the task of making decisions, and where patients are supported to consider options, to achieve informed preferences”*

| Yes | No |
| --- | --- |

1. **Do you have** **experience in palliative care?**

*According to the WHO (2016) palliative care is defined ''an approach that improves the quality of life of patients and their families facing the problems associated with life-threatening illness, through the prevention and relief of suffering by means of early identification and impeccable assessment and treatment of pain and other problems, physical, psychosocial, and spiritual''.*

| Yes | No |
| --- | --- |

1. **Before today which of the following describes your situation best about Interprofessional Shared Decision-Making (IP-SDM)?**

|  | I have never heard about IP-SDM |
| --- | --- |
|  | I have only heard about IP-SDM but don't really know what it is |
|  | I know a little bit about IP-SDM |
|  | I know what IP-SDM is and I could explain it to someone else |

1. **On a scale from 1 to 10, how would you describe your level of knowledge about Interprofessional Shared Decision-Making (IP-SDM) in palliative care?**

*(****1*** *represents poor knowledge and* ***10*** *represents excellent knowledge)*

| **1** | **2** | **3** | **4** | **5** | **6** | **7** | **8** | **9** | **10** |
| --- | --- | --- | --- | --- | --- | --- | --- | --- | --- |

**Section two:**

*In this section, there are 12 items about your perceptions**to engage in an IP-SDM education in palliative care.*

**On a scale from 1 to 7, place a number that corresponds to your opinion about Interprofessional Shared-Decision making (IP-SDM) education in palliative care.**

| 1. ***Intention*** | | | | | | | |
| --- | --- | --- | --- | --- | --- | --- | --- |
| **Item** | **1** | **2** | **3** | **4** | **5** | **6** | **7** |
| 1. I intend to engage in IP-SDM education in palliative care in the next 6 months   ***(Strongly disagree= 1 to strongly agree= 7)*** |  |  |  |  |  |  |  |
| 1. I plan to engage in IP-SDM education in palliative care in the next 6 months   ***(Strongly disagree= 1 to strongly agree= 7)*** |  |  |  |  |  |  |  |
| 1. ***Social influence*** | | | | | | | |
| 1. Now think about a colleague a co-worker whom you respect as a professional. In your opinion, would he/she engage in IP-SDM education in palliative care in the next 6 months?   ***(Never=1 to always=7)*** |  |  |  |  |  |  |  |
| 1. Most people who are important to me in my profession would engage in IP-SDM education in palliative care in the next 6 months   ***(Strongly disagree= 1 to strongly agree= 7)*** |  |  |  |  |  |  |  |
| 1. To the best of my knowledge, the percentage of my colleagues who would engage in IP-SDM education in palliative care in the next 6 months is | | | **0-20%** | **21-40**  **%** | **41-60%** | **61-80%** | **81-100%** |
| 1. ***Beliefs about capabilities*** | | | | | | | |
| 1. I am confident that I could engage in IP-SDM education in palliative care in the next 6 months if I wanted to   ***(Strongly disagree= 1 to strongly agree= 7)*** |  |  |  |  |  |  |  |
| 1. For me, engaging in IP-SDM education in palliative care in the next 6 months would be   ***(Extremely difficult= 1 to easy= 7)*** |  |  |  |  |  |  |  |
| 1. I have the ability to engage in IP-SDM education in palliative care in the next 6 months   ***(Strongly disagree= 1 to strongly agree= 7)*** |  |  |  |  |  |  |  |
| 1. ***Moral norm*** | | | | | | | |
| 1. Engage in IP-SDM education in palliative care in the next 6 months is an ethical thing to do   ***(Strongly disagree= 1 to strongly agree= 7)*** |  |  |  |  |  |  |  |
| 1. It is acceptable to engage in IP-SDM education in palliative care in the next 6 months   ***(Strongly disagree= 1 to strongly agree= 7)*** |  |  |  |  |  |  |  |
| 1. ***Beliefs about consequences*** | | | | | | | |
| 1. Overall, I think that for me engaging in IP-SDM education in palliative care in the next 6 months would be   ***(Useless= 1 to useful= 7)*** |  |  |  |  |  |  |  |
| 1. Overall, I think that for me engaging in IP-SDM education in palliative care in the next 6 months would be   ***(Harmful= 1 to beneficial= 7)*** |  |  |  |  |  |  |  |

- **Section three:**

*In this section, we would like to ask you about your practice in IP-SDM based on the partnership/shared decision-making scale in the Assessment of Interprofessional Team Collaboration Scale (AITCS)*

1. **Have you been involved in Interprofessional Shared Decision-Making (IP-SDM)?**

***If yes, please answer questions 33 to 55.***

| Yes | No |
| --- | --- |

1. **Please indicate** **one of the health complaints/problems/illnesses the consultation was about:**

|  |
| --- |

1. **Please indicate which decision was made:**

|  |
| --- |

1. **How do you feel about the Interprofessional Shared Decision-Making (IP-SDM) experience?**

| Very positive | More positive than negative | More negative than positive | Very negative |
| --- | --- | --- | --- |

1. **Which best reflects how you currently feel your team and you, as a member of the team, work or act within the team.**

| Very positive | More positive than negative | More negative than positive | Very negative |
| --- | --- | --- | --- |

**On a scale from 1 to 5, how often do the following aspects of working as a team happen?**

**(1 = “Never”; 2 = “Rarely”; 3 = “Occasionally”; 4 = “Most of the time”; to 5 = “Always”)**

| **When we are working as a team in palliative care all of my team members** | **1** | **2** | **3** | **4** | **5** |
| --- | --- | --- | --- | --- | --- |
| 1. Establish agreements on goals for each patient we care for |  |  |  |  |  |
| 1. Are committed to the goals set out by the team |  |  |  |  |  |
| 1. Include patients in setting goals for their care |  |  |  |  |  |
| 1. Listen to the wishes of their patients when determining the process of care chosen by the team |  |  |  |  |  |
| 1. Meet and discuss patient care on a regular basis |  |  |  |  |  |
| 1. Would agree that there is support from the organization for teamwork |  |  |  |  |  |
| 1. Coordinate health and social services based upon patient care needs |  |  |  |  |  |
| 1. Use a variety of communication means |  |  |  |  |  |
| 1. Use consistent communication with team members to discuss patient care |  |  |  |  |  |
| 1. Are involved in goal setting for each patient |  |  |  |  |  |
| 1. Listen to and consider other members’ voices and opinions/views in regard to deciding on individual care planning processes |  |  |  |  |  |
| 1. Would agree when care decisions are made, the leader strives to obtain consensus on planned processes from all parties |  |  |  |  |  |
| 1. Feel a sense of belonging to the group |  |  |  |  |  |
| 1. Establish deadlines for steps and outcome markers in regard to patient care |  |  |  |  |  |
| 1. Jointly agree to communicate plans for patient care |  |  |  |  |  |
| 1. Consider alternative approaches to achieve shared goals |  |  |  |  |  |
| 1. Encourage each other and patients and their families to use the knowledge and skills that each of us can bring in developing plans of care |  |  |  |  |  |
| 1. Focus of our teamwork is consistently the patient |  |  |  |  |  |
| 1. Work with the patient and his/her relatives in adjusting care plans |  |  |  |  |  |

**Do you have any remarks?**

**Thank you for your participation**

**Notes:** Section two adapted from Légaré F, Borduas F, Freitas A, et al. Development of a simple 12-item theory-based instrument to assess the impact of continuing professional development on clinical behavioral intentions*. PloS One*. 2014; 9(3), e91013.‏26 Section three adapted from Orchard CA, King GA, Khalili H, et al. Assessment of interprofessional team collaboration scale (AITCS): development and testing of the instrument. [*J Contin Educ Health Prof*](https://journals.lww.com/jcehp/pages/default.aspx). 2012;32(1):58-67.‏27

**Figure S2.** Data collection tool for health professions students

**Perceptions and practice from the students’ perspectives toward Interprofessional Shared Decision-Making (IP-SDM) for health professions education in palliative care.**

You are kindly being invited to participate in a study about Interprofessional Shared Decision-Making (IP-SDM) for health professions education in palliative care. The study will be conducted at King Abdulaziz Medical City, Jeddah. By conducting this study, we explore what your opinion is about IP-SDM in palliative care. You don’t have to have any experience with this topic yet. There are no ‘right’ or ‘wrong’ answers, we would like to know your opinion!

This survey consists of a total of 46 questions with multiple answering options. It takes approximately 8-10 minutes to complete. If you have any questions about the study, please contact Ms. Lama Sultan ([sultanla@mngha.med.sa](mailto:sultanla@mngha.med.sa)). The study has been approved by King Abdullah International Medical Research Center (KAIMRC), IRB (RJ20/242/J).

Your participation in this survey will be highly appreciated.

Your participation is completely voluntary. You are free to decline to participate for any reason. You may also stop participating at any time or refuse to answer any individual questions. Your acceptance to complete this survey will be interpreted as your informed consent to participate.

I have read and I understand the information about the study and what it means to me if I participate.

| I agree | I disagree |
| --- | --- |

- **Section one:**

*In this section, there are 11 questions about demographic, your study background, and familiarity with the topic:*

1. **Gender**

| Male | Female |
| --- | --- |

1. **Age ___________________ years**
2. **Nationality __________________**
3. **Institute ______________________**
4. **Department/College ___________________________**
5. **Years of study ______________________**
6. **Do you have experience with interprofessional education during your training so far?**

*According to the WHO (2010), interprofessional education (IPE) is an experience that “occurs when students from two or more professions learn about, from, and with each other”.*

| Yes | No |
| --- | --- |

1. **Do you have experience with shared decision-making (SDM) during your training so far?**

*(SDM) is defined as: ‘an approach where clinicians and patients share the best available evidence when faced with the task of making decisions, and where patients are supported to consider options, to achieve informed preferences”*

| Yes | No |
| --- | --- |

1. **Have you studied about palliative care or encountered a palliative patient during your training?**

*According to the WHO (2016) palliative care is defined as ''an approach that improves the quality of life of patients and their families facing the problems associated with life-threatening illness, through the prevention and relief of suffering by means of early identification and impeccable assessment and treatment of pain and other problems, physical, psychosocial, and spiritual''.*

| Yes | No |
| --- | --- |

1. **Before today which of the following describes your situation best about Interprofessional Shared Decision-Making (IP-SDM)?**

|  | I have never heard about IP-SDM |
| --- | --- |
|  | I have only heard about IP-SDM but don't really know what it is |
|  | I know a little bit about IP-SDM |
|  | I know what IP-SDM is and I could explain it to someone else |

1. **On a scale from 1 to 10, how would you describe your level of knowledge about Interprofessional Shared Decision-Making (IP-SDM) in palliative care?**

*(****1*** *represents poor knowledge and* ***10*** *represents excellent knowledge)*

| **1** | **2** | **3** | **4** | **5** | **6** | **7** | **8** | **9** | **10** |
| --- | --- | --- | --- | --- | --- | --- | --- | --- | --- |

- **Section two:**

*In this section, there are 12 items about your perceptions**to engage in an IP-SDM education in palliative care.*

**On a scale from 1 to 7, place a number that corresponds to your opinion about Interprofessional Shared-Decision making (IP-SDM) in palliative care.**

| 1. ***Intention*** | | | | | | | | |
| --- | --- | --- | --- | --- | --- | --- | --- | --- |
| **Item** | **1** | **2** | | **3** | **4** | **5** | **6** | **7** |
| 1. I intend to engage in IP-SDM in palliative care if I get the opportunity during my studies or thereafter.   ***(Strongly disagree= 1 to Strongly agree= 7)*** |  |  | |  |  |  |  |  |
| 1. I plan to engage in IP-SDM in palliative care if I get the opportunity during my studies or thereafter.   ***(Strongly disagree= 1 to Strongly agree= 7)*** |  |  | |  |  |  |  |  |
| 1. ***Social influence*** | | | | | | | | |
| 1. Now think about a fellow-student whom you respect as a future professional. In your opinion, would he/she engage in IP-SDM in palliative care if he/she gets the opportunity during his/her studies or thereafter?   ***(Never=1 to always=7)*** |  |  | |  |  |  |  |  |
| 1. Most fellow- students who are important to me in my profession would engage in IP-SDM in palliative care if they get the opportunity during their studies or thereafter.   ***(Strongly disagree= 1 to Strongly agree= 7)*** |  |  | |  |  |  |  |  |
| 1. To the best of my knowledge, the percentage of my fellow-students who would engage in IP-SDM in palliative care if they get the opportunity during or after their studies is…. | | | **0-20%** | | **21-40**  **%** | **41-60%** | **61-80%** | **81-100%** |
| 1. ***Beliefs about capabilities*** | | | | | | | | |
| 1. I am confident that I could engage in IP-SDM in palliative care during my studies or thereafter if I wanted to.   ***(Strongly disagree= 1 to Strongly agree= 7)*** |  |  | |  |  |  |  |  |
| 1. For me, engaging in IP-SDM in palliative care   during my studies or thereafter would be.  ***(Extremely difficult= 1 to easy= 7)*** |  |  | |  |  |  |  |  |
| 1. I have the ability to engage in IP-SDM in palliative care if I get the opportunity during my studies or thereafter.   ***(Strongly disagree= 1 to Strongly agree= 7)*** |  |  | |  |  |  |  |  |
| 1. ***Moral norm*** | | | | | | | | |
| 1. Engaging in IP-SDM in palliative care if I get the opportunity during my studies or thereafter is an ethical thing to do.   ***(Strongly disagree= 1 to Strongly agree= 7)*** |  |  | |  |  |  |  |  |
| 1. It is acceptable to engage in IP-SDM in palliative care if I get the opportunity during my studies or thereafter.   ***(Strongly disagree= 1 to Strongly agree= 7)*** |  |  | |  |  |  |  |  |
| 1. ***Beliefs about consequences*** | | | | | | | | |
| 1. Overall, I think that for me engaging in IP-SDM in palliative care if I get the opportunity during my studies or thereafter would .   ***(Useless= 1 to useful= 7)*** |  |  | |  |  |  |  |  |
| 1. Overall, I think that for me engaging in IP-SDM in palliative care if I get the opportunity during my studies or thereafter would.   ***(Harmful= 1 to beneficial= 7)*** |  |  | |  |  |  |  |  |

- **Section three:**

*In this section, we would like to ask you about your practice in IP-SDM based on the partnership/shared decision-making scale in the Assessment of Interprofessional Team Collaboration Scale (AITCS)*

1. **Have you been involved in or experienced any Interprofessional Shared Decision-Making (IP-SDM) during your training so far?**

***If yes, please answer questions 25 to 46.***

| Yes | No |
| --- | --- |

1. **Please indicate one of the health complaints/problems/illnesses the consultation was about:**

|  |
| --- |

1. **Please indicate which decision was made:**

|  |
| --- |

1. **How do you feel about the Interprofessional Shared Decision-Making (IP-SDM) experience?**

| Very positive | More positive than negative | More negative than positive | Very negative |
| --- | --- | --- | --- |

**On a scale from 1 to 5, place a number that corresponds to your opinion on shared decision making.**

**(1 = “Never”; 2 = “Rarely”; 3 = “Occasionally”; 4 = “Most of the time”; to 5 = “Always”)**

| **When we are working as a palliative care team or observing the palliative care team all of the team members** | **1** | **2** | **3** | **4** | **5** |
| --- | --- | --- | --- | --- | --- |
| 1. Establish agreements on goals for each patient we care for |  |  |  |  |  |
| 1. Are committed to the goals set out by the team |  |  |  |  |  |
| 1. Include patients in setting goals for their care |  |  |  |  |  |
| 1. Listen to the wishes of their patients when determining the process of care chosen by the team |  |  |  |  |  |
| 1. Meet and discuss patient care on a regular basis |  |  |  |  |  |
| 1. Would agree that there is support from the organisation for teamwork |  |  |  |  |  |
| 1. Coordinate health and social services based upon patient care needs |  |  |  |  |  |
| 1. Use a variety of communication means |  |  |  |  |  |
| 1. Use consistent communication with team members to discuss patient care |  |  |  |  |  |
| 1. Are involved in goal setting for each patient |  |  |  |  |  |
| 1. Listen to and consider other members’ voices and opinions/views in regard to deciding on individual care planning processes |  |  |  |  |  |
| 1. Would agree when care decisions are made, the leader strives to obtain consensus on planned processes from all parties |  |  |  |  |  |
| 1. Feel a sense of belonging to the group |  |  |  |  |  |
| 1. Establish deadlines for steps and outcome markers in regards to patient care |  |  |  |  |  |
| 1. Jointly agree to communicate plans for patient care |  |  |  |  |  |
| 1. Consider alternative approaches to achieve shared goals |  |  |  |  |  |
| 1. Encourage each other and patients and their families to use the knowledge and skills that each of us can bring in developing plans of care |  |  |  |  |  |
| 1. Focus of our teamwork is consistently the patient |  |  |  |  |  |
| 1. Work with the patient and his/her relatives in adjusting care plans |  |  |  |  |  |

**Do you have any remarks?**

**Thank you for your participation**

**Notes:** Section two adapted from Légaré F, Borduas F, Freitas A, et al. Development of a simple 12-item theory-based instrument to assess the impact of continuing professional development on clinical behavioral intentions*. PloS One*. 2014; 9(3), e91013.‏26 Section three adapted from Orchard CA, King GA, Khalili H, et al. Assessment of interprofessional team collaboration scale (AITCS): development and testing of the instrument. [*J Contin Educ Health Prof*](https://journals.lww.com/jcehp/pages/default.aspx). 2012;32(1):58-67.‏27
